# Supplementary material
Source: Springer Nature journal article supplement (https://www.springermedizin.de/resource/supplementary/12879_2009_1066_MOESM5_ESM.pdf/9442504)

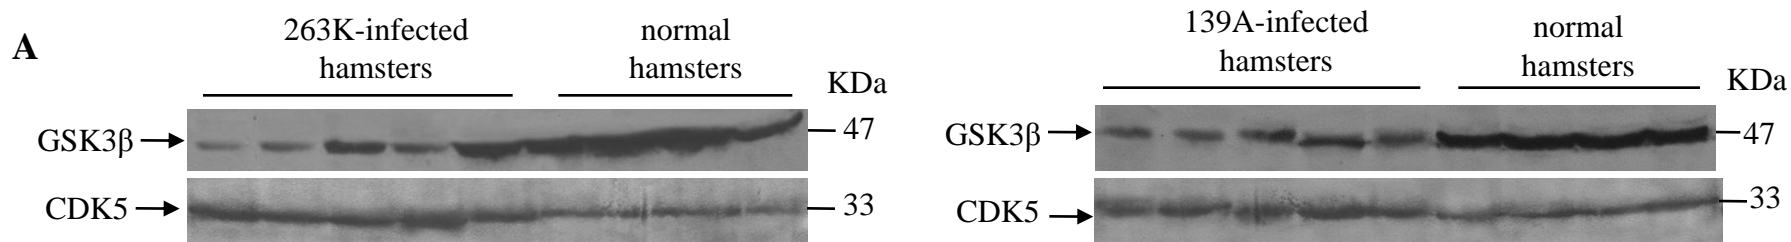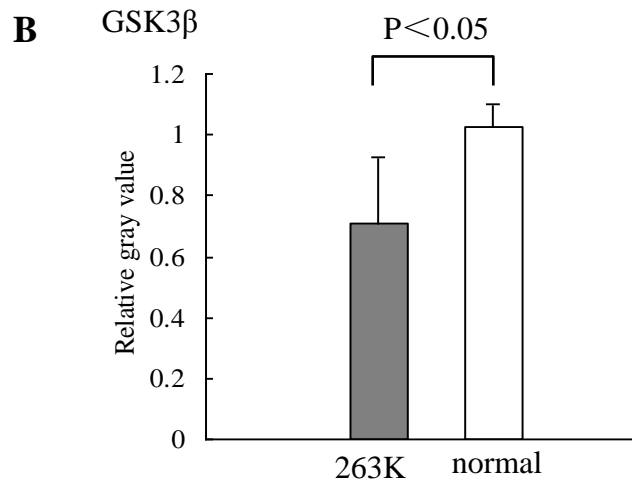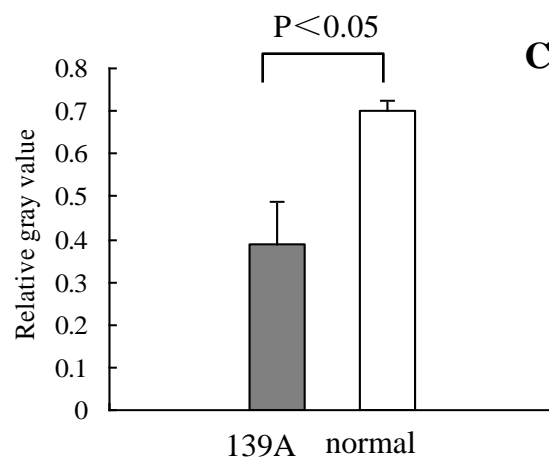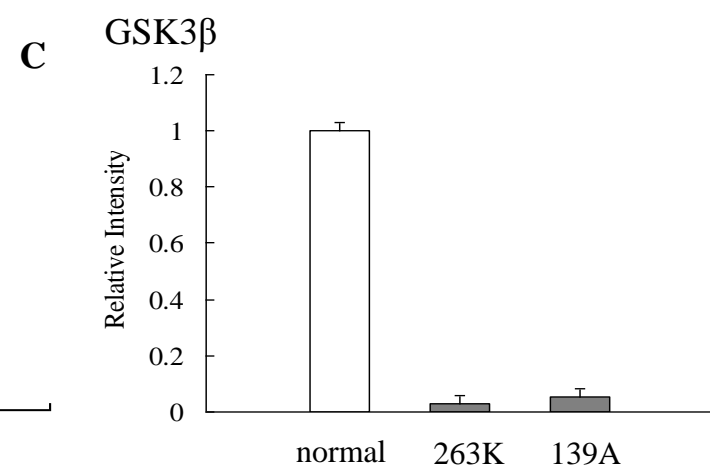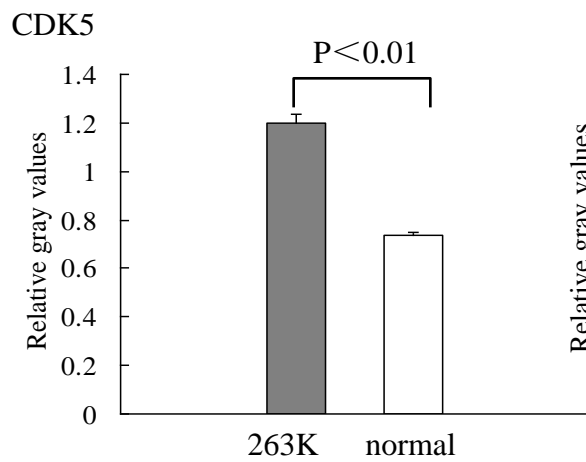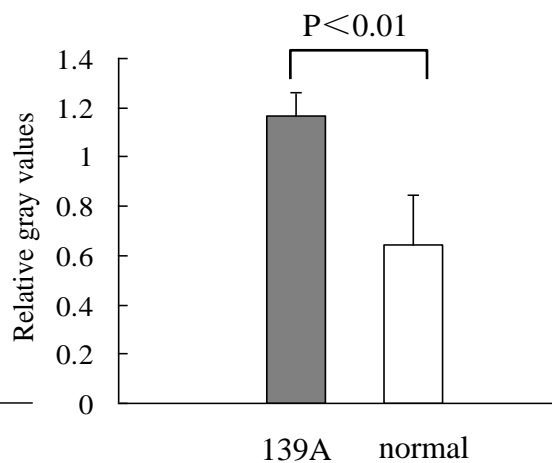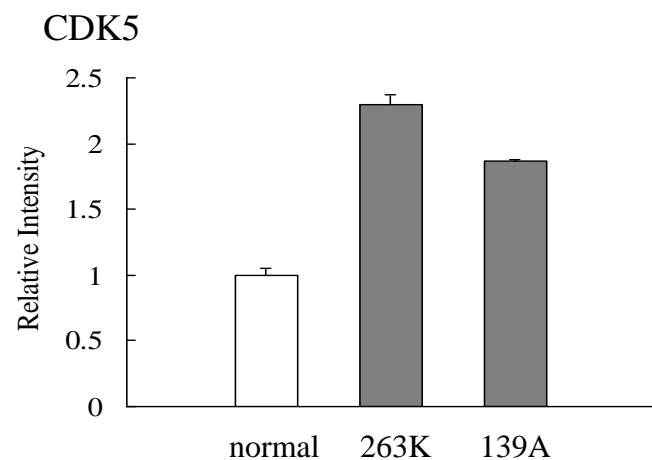

Supplement: MOESM5 [file 9442504]
